# Supplementary material
Source: Springer Nature journal article supplement (https://www.springermedizin.de/resource/supplementary/12950_2009_135_MOESM2_ESM.pdf/9558034)

## Hargreaves test

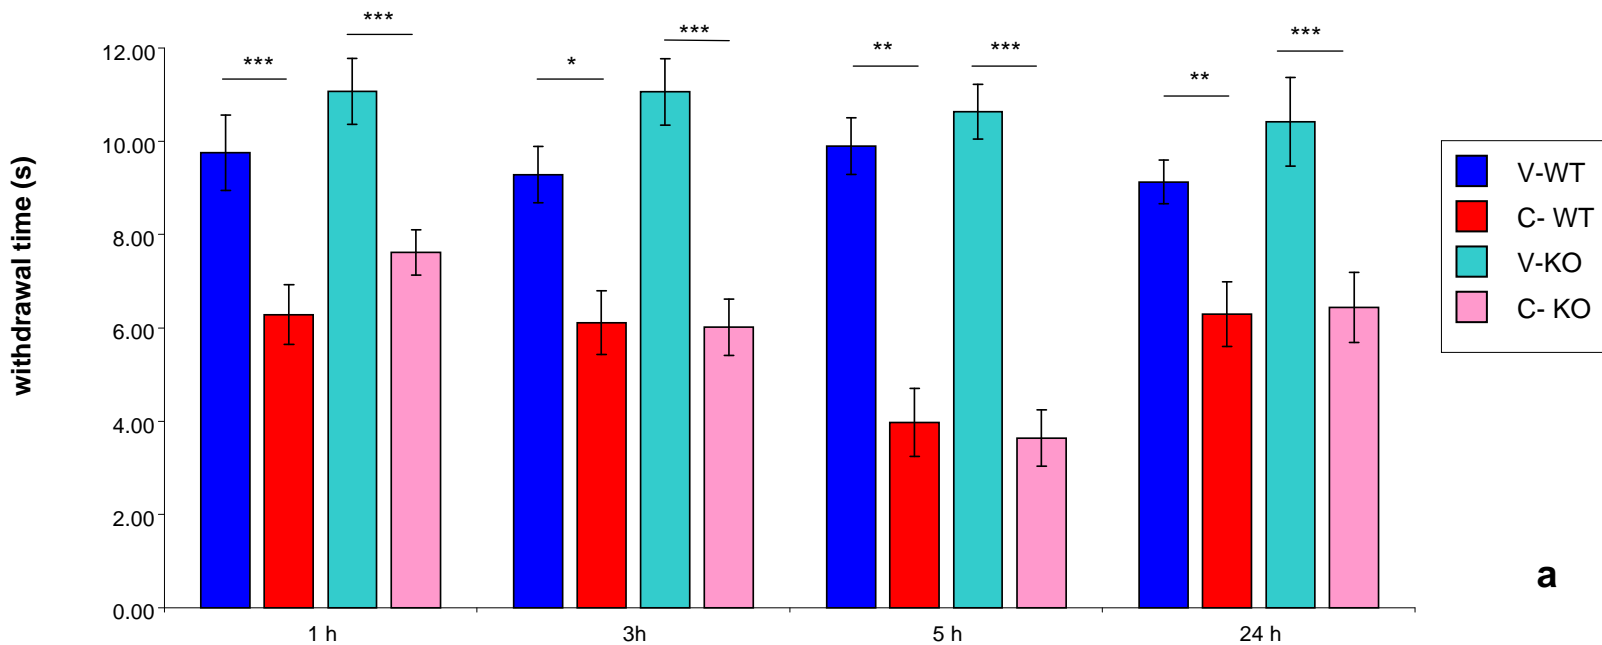

**a**

## Von frey test

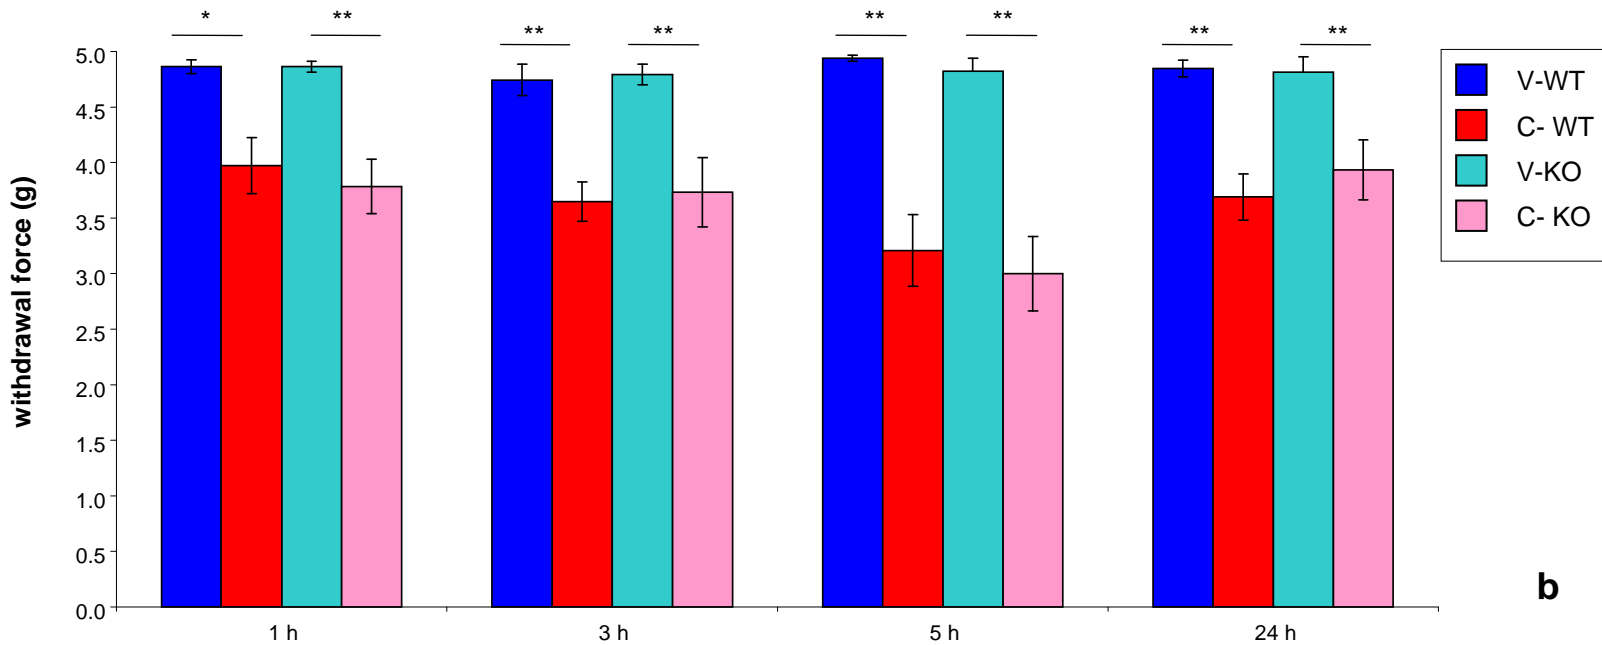

**b**

Supplement: MOESM2 [file 9558034]
